# Supplementary material for: Diabetes mellitus accelerates the progression of osteoarthritis in streptozotocin-induced diabetic mice by deteriorating bone microarchitecture, bone mineral composition, and bone strength of subchondral bone
Source: PubMed Central journal article supplement — Ann Transl Med. 2021 May;9(9):768. doi: 10.21037/atm-20-6797 (PMC8246216; doi:10.21037/atm-20-6797), 2021-05
Supplement: atm-09-09-768-dss.pdf [file atm-09-09-768-dss.pdf]

## Data Sharing Statement

|                     |                                                                                                                                                     |                                                            |
|---------------------|-----------------------------------------------------------------------------------------------------------------------------------------------------|------------------------------------------------------------|
| <b>Article Info</b> | <a href="http://dx.doi.org/10.21037/atm-20-6797">http://dx.doi.org/10.21037/atm-20-6797</a>                                                         |                                                            |
| <b>Item</b>         | <b>Question</b>                                                                                                                                     | <b>Authors' Response<br/>(place "-" if not applicable)</b> |
| 1                   | Would you like to share data collected for your study to others?                                                                                    | Yes.                                                       |
| 2                   | If not, would you like to share the reason for your decision?                                                                                       | -                                                          |
| 3                   | What data in particular will be shared?                                                                                                             | The histology data will be shared.                         |
| 4                   | Any other documents will be shared? Such as study protocol, statistical analysis plan, informed consent form, clinical study report, analytic code. | No.                                                        |
| 5                   | When will data availability begin?                                                                                                                  | From the publication date.                                 |
| 6                   | When will data availability end?                                                                                                                    | December 31, 2021.                                         |
| 7                   | To whom will you share the data?                                                                                                                    | Experts who are interested in OA.                          |
| 8                   | For what type of analysis or purpose?                                                                                                               | For analysis to investigate the development of DM-OA.      |
| 9                   | How or where can the data/documents be obtained?                                                                                                    | E-mail the corresponding author.                           |
| 10                  | Any other restrictions?                                                                                                                             | -                                                          |
